# Supplementary material for: Platelet Activation by Antisense Oligonucleotides (ASOs) in the Göttingen Minipig, including an Evaluation of Glycoprotein VI (GPVI) and Platelet Factor 4 (PF4) Ontogeny
Source: MDPI journal article supplement (doi:10.3390/pharmaceutics15041112), 2023-03-31
Supplement: s1 [file s1]

# Platelet Activation by Antisense Oligonucleotides (ASOs) in the Göttingen Minipig, including an Evaluation of Glycoprotein VI (GPVI) and Platelet Factor 4 (PF4) Ontogeny

Allan Valenzuela, Miriam Ayuso, Laura Buysens, Chloe Bars, Chris Van Ginneken, Yann Tessier, and Steven Van Cruchten

**Table S1.** Juvenile Göttingen Minipig sample overview from the in vivo 8-week repeat-dose toxicity study (Valenzuela et al., 2021) [1].

| Animal | Age       | Sex    | Treatment | Platelet count (Giga/L) | GPVI abundance (ng/ml)                   |                                  | PF4 abundance (ng/ml) |
|--------|-----------|--------|-----------|-------------------------|------------------------------------------|----------------------------------|-----------------------|
|        |           |        |           |                         | Adjusted to $1 \times 10^8$ platelets/ml | Adjusted to platelet count in WB |                       |
| 501    | PND 2     | male   | control   | 433                     | h                                        | h                                | h                     |
| 511    | PND 2     | female | control   | 389                     | h                                        | h                                | h                     |
| 521    | PND 2     | male   | treated   | 348                     | h                                        | h                                | h                     |
| 531    | PND 2     | female | treated   | 344                     | h                                        | h                                | h                     |
| 503    | PND 9     | male   | control   | 1096                    | 13.14                                    | 144.04                           | 2814                  |
| 513    | PND 9     | female | control   | 977                     | 7.81                                     | 76.26                            | 3184                  |
| 523    | PND 9     | male   | treated   | 969                     | 5.42                                     | 52.53                            | 3036                  |
| 535    | PND 9     | female | treated   | 1097                    | 7.93                                     | 86.95                            | 2346                  |
| 504    | PND 16    | male   | control   | 456                     | 3.38                                     | 15.40                            | 2154                  |
| 517    | PND 16    | female | control   | 677                     | 6.80                                     | 46.05                            | 1676                  |
| 524    | PND 16    | male   | treated   | 546                     | 4.39                                     | 23.99                            | 1858                  |
| 537    | PND 16    | female | treated   | 660                     | 14.15                                    | 93.42                            | 1182                  |
| 512    | PND 23    | female | control   | 457                     | 24.90                                    | 113.79                           | 1017                  |
| 522    | PND 23    | male   | treated   | 226                     | 27.32                                    | 61.74                            | 1602                  |
| 532    | PND 23    | female | treated   | 581                     | 8.35                                     | 48.52                            | 1771                  |
| 534    | PND 23    | female | treated   | 682                     | 50.26                                    | 342.77                           | 280                   |
| 515    | PND 29-30 | female | control   | 666                     | 3.44                                     | 22.90                            | 2952                  |
| 527    | PND 29-30 | male   | treated   | 643                     | 5.51                                     | 35.46                            | 790                   |
| 533    | PND 29-30 | female | treated   | 650                     | 37.23                                    | 241.97                           | 1392                  |
| 505    | PND 37    | male   | control   | 644                     | 5.16                                     | 33.23                            | 715                   |
| 518    | PND 37    | female | control   | 517                     | 38.45                                    | 198.80                           | 1741                  |
| 525    | PND 37    | male   | treated   | 699                     | 9.86                                     | 68.91                            | 881                   |
| 538    | PND 37    | female | treated   | 676                     | 15.72                                    | 106.23                           | 2313                  |

|     |        |        |         |     |       |        |      |
|-----|--------|--------|---------|-----|-------|--------|------|
| 519 | PND 43 | female | control | 724 | 23.03 | 166.75 | 2300 |
| 520 | PND 43 | female | control | 723 | 4.15  | 29.98  | 3113 |
| 539 | PND 43 | female | treated | 892 | 3.86  | 34.46  | 3141 |
| 514 | PND 51 | female | control | 751 | 12.84 | 96.45  | 1731 |
| 516 | PND 51 | female | control | 835 | 9.94  | 82.99  | 2164 |
| 526 | PND 51 | male   | treated | 828 | 3.77  | 31.19  | 3337 |
| 536 | PND 51 | female | treated | 728 | 3.25  | 23.69  | 2987 |

Abbreviations: WB, whole blood; h, hemolyzed; PND, postnatal day; GPVI, glycoprotein VI; PF4, platelet factor 4.

### Reference:

1. Valenzuela, A.; Tardiveau, C.; Ayuso, M.; Buyssens, L.; Bars, C.; van Ginneken, C.; Fant, P.; Leconte, I.; Braendli-Baiocco, A.; Parrott, N.; et al. Safety Testing of an Antisense Oligonucleotide Intended for Pediatric Indications in the Juvenile Göttingen Minipig, Including an Evaluation of the Ontogeny of Key Nucleases. *Pharmaceutics* **2021**, *13*, doi:10.3390/pharmaceutics13091442.
